# Supplementary material for: Antibiotic-Resistant Bacteria in Drinking Water from the Greater Accra Region, Ghana: A Cross-Sectional Study, December 2021–March 2022
Source: MDPI journal article supplement (doi:10.3390/ijerph191912300), 2022-09-28
Supplement: s1 [file s1]

**Table S1.** Supplementary table showing various districts and number of multidrug resistant isolates

[illegible]
